# Supplementary material
Source: PubMed Central journal article supplement (PMC3771343)
Supplement: emboj2013178df4.pdf [file emboj2013178df4.pdf]

# Source Data Fig 4B & Fig 4E

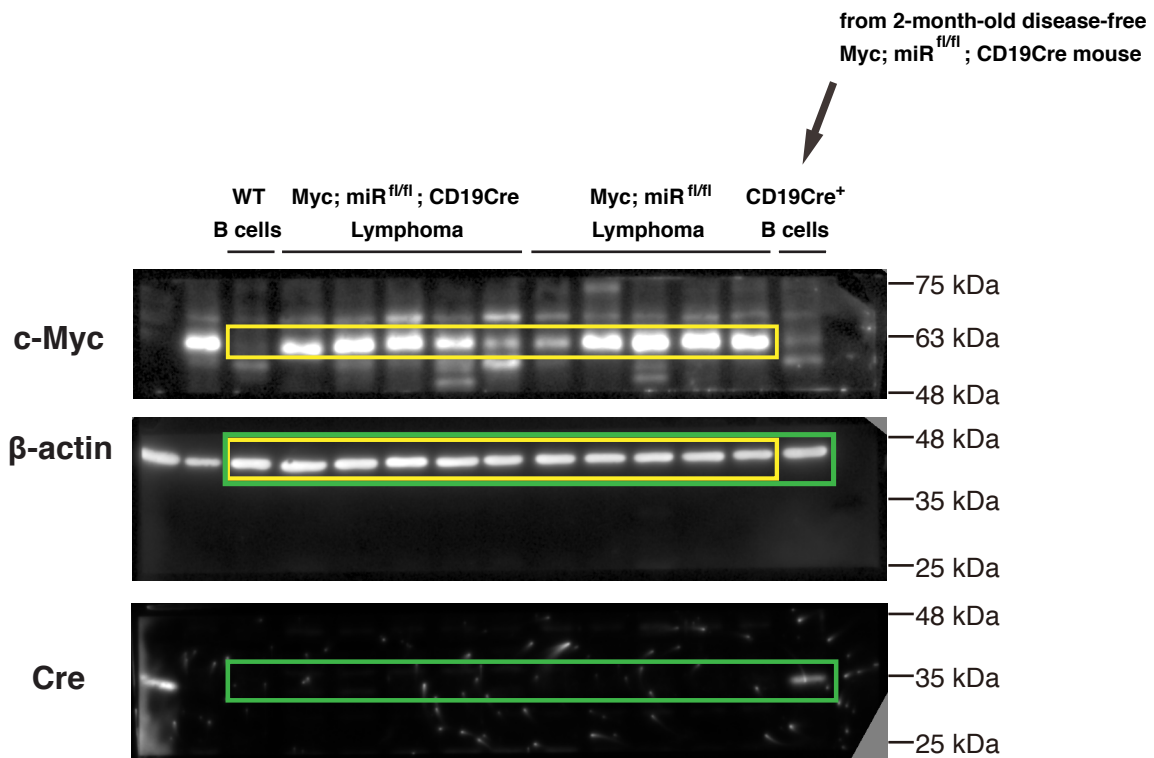

Green boxes indicate cropped images for Figure 4B  
Yellow boxes indicate cropped images for Figure 4E
