# Supplementary material
Source: PubMed Central journal article supplement (PMC3771343)

Source Data Fig 7A

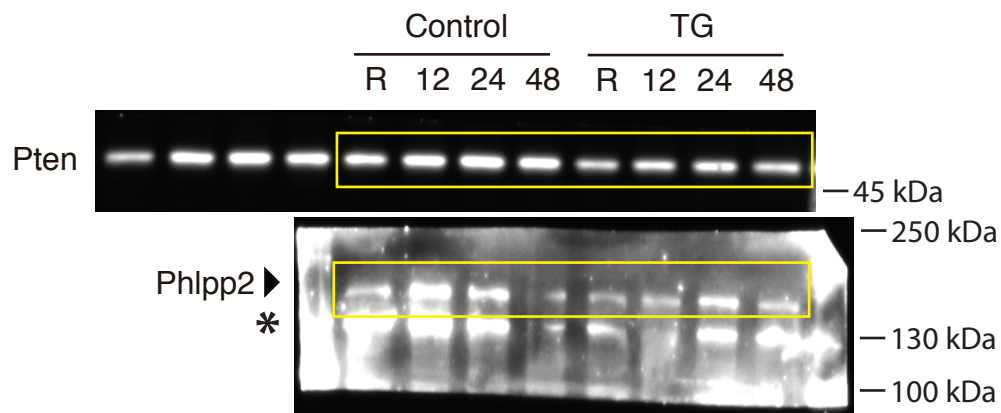

Note: Lower band (~120kDa) indicated by\* was detected when membrane was blotted with 5% BSA solution, but not detected when blotted with 5% dry milk solution. Retroviral expression of human Phlpp2 in mouse CD4 T cells generates only the upper band (150kDa), suggesting that the lower band is a non-specific band.

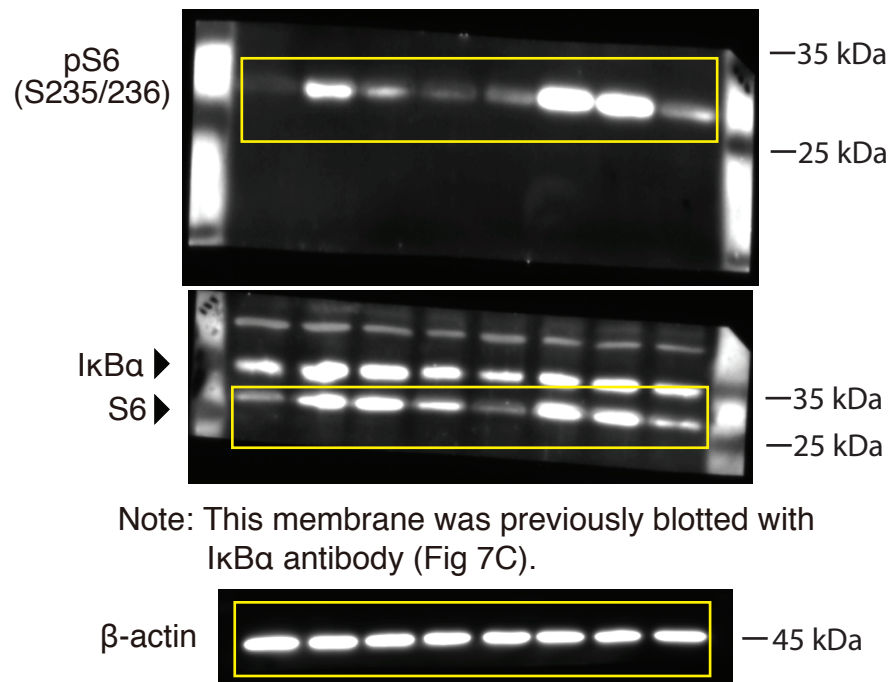

Note: This membrane was previously blotted with IκBα antibody (Fig 7C).

Source Data Fig 7C

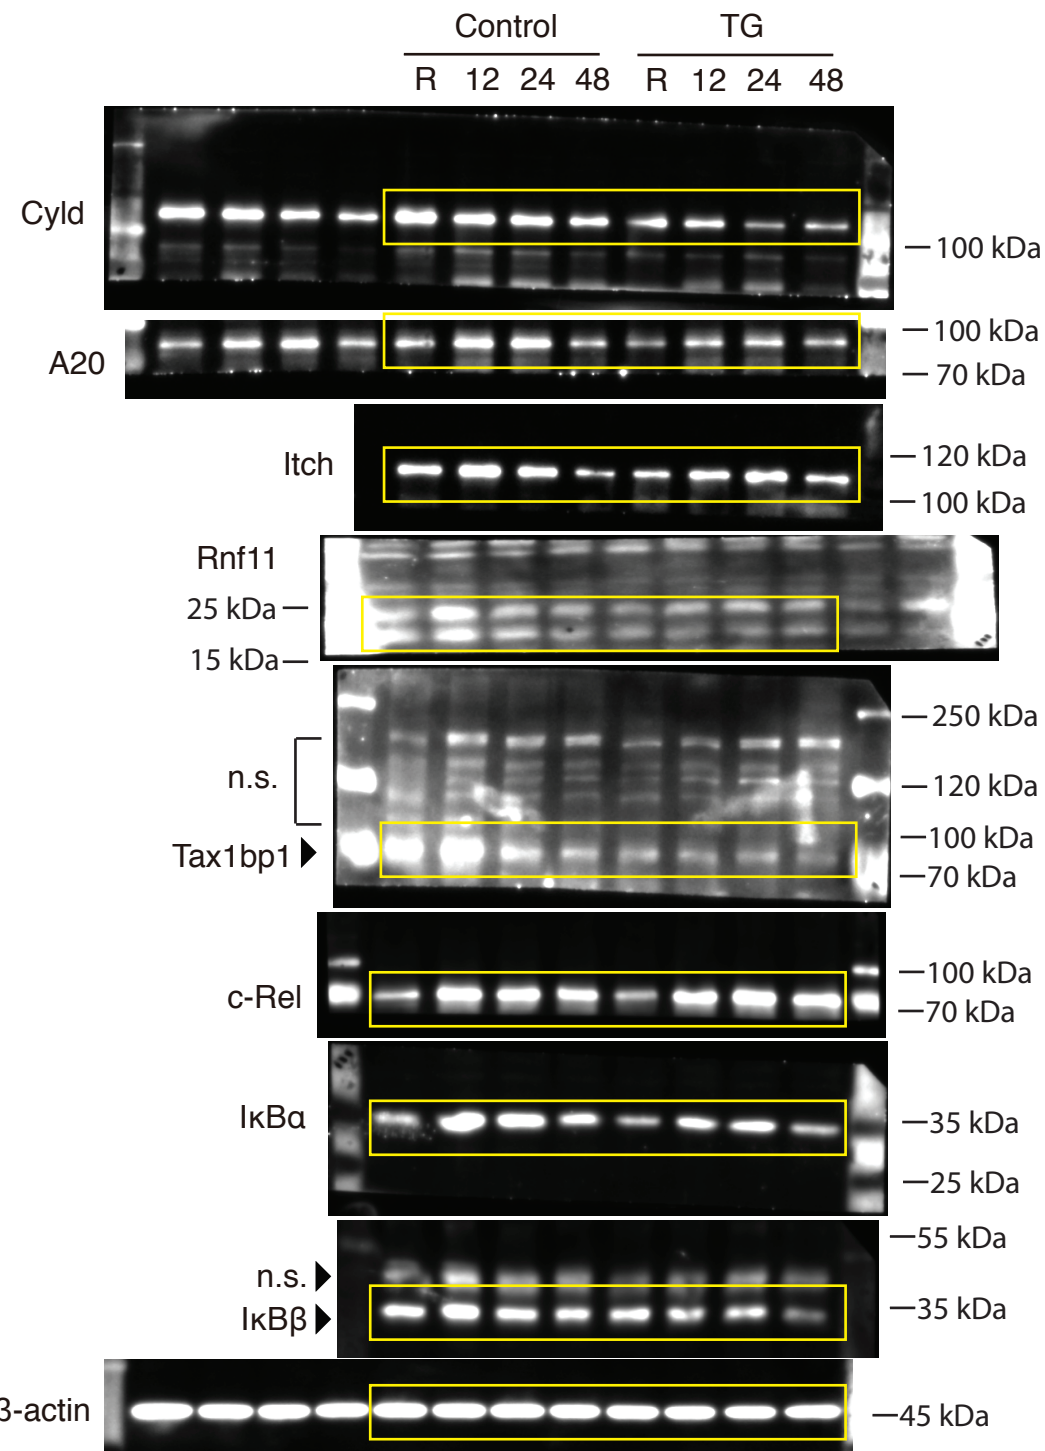

Supplement: emboj2013178df7.pdf [file emboj2013178df7.pdf]
