# Supplementary material
Source: PubMed Central journal article supplement (PMC3771343)

# Source Data Fig 2B

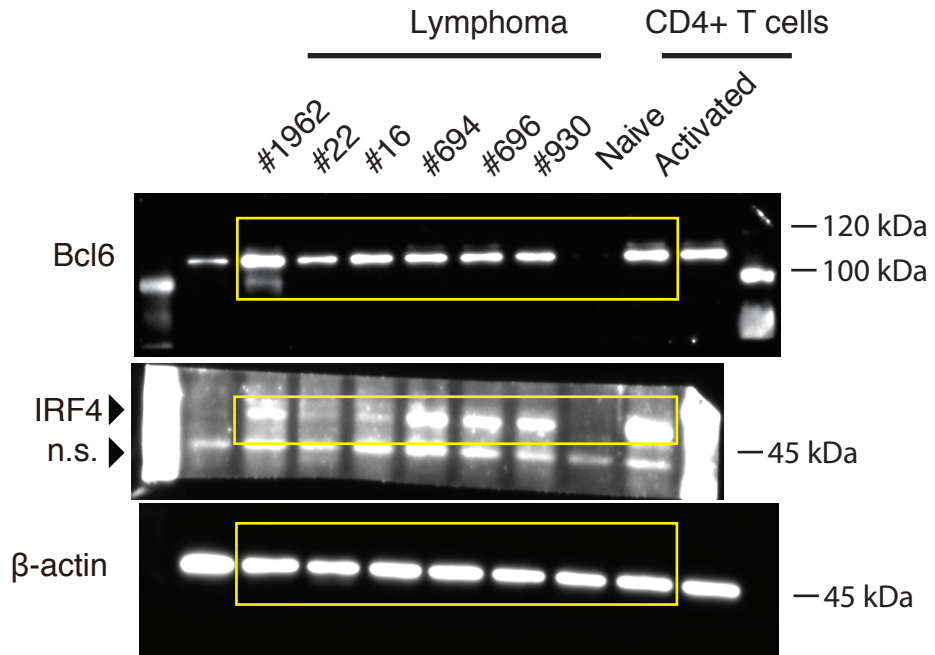

Supplement: emboj2013178df2b.pdf [file emboj2013178df2b.pdf]

# Source Data Fig 3A

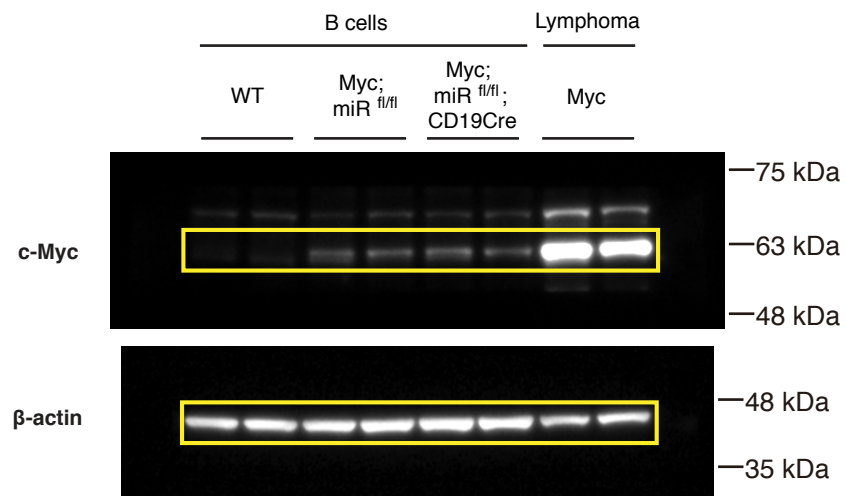

Supplement: emboj2013178df3a.pdf [file emboj2013178df3a.pdf]

### Source Data Fig 6D

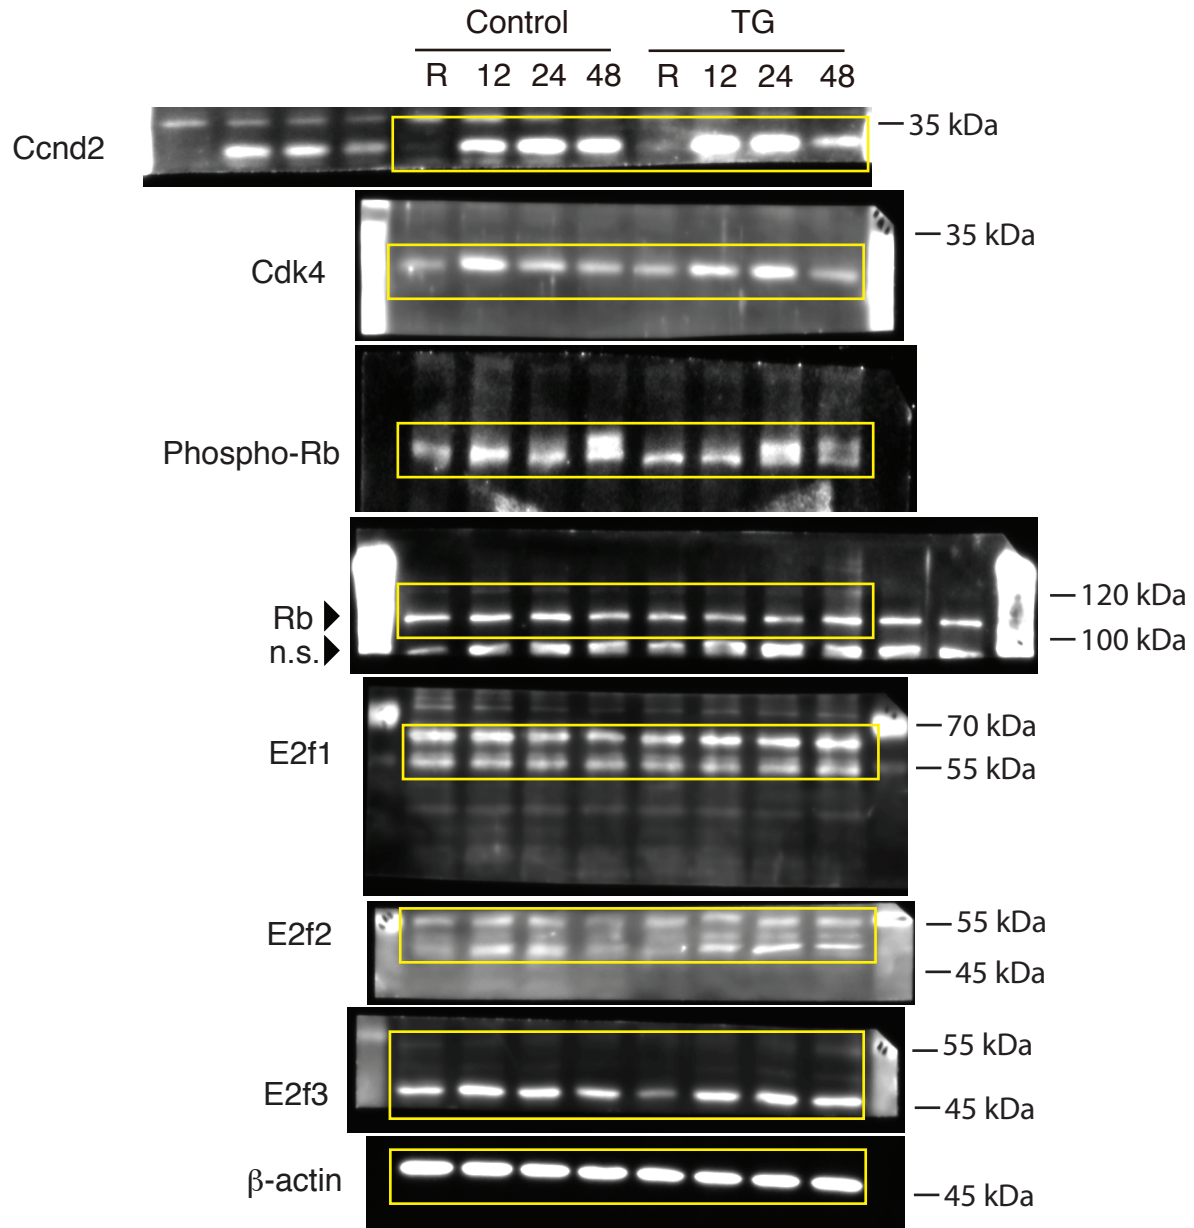

### Source Data Fig 6E

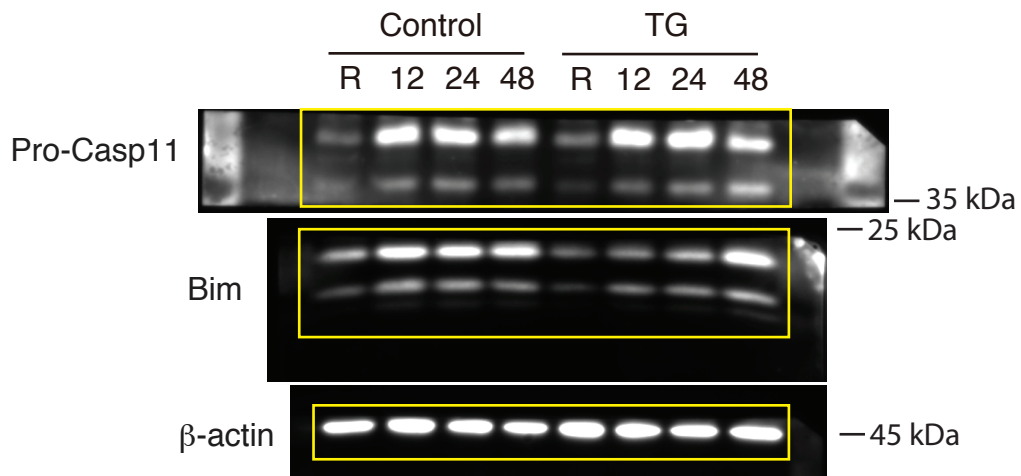

Supplement: emboj2013178df6.pdf [file emboj2013178df6.pdf]

# Source Data Fig 8D

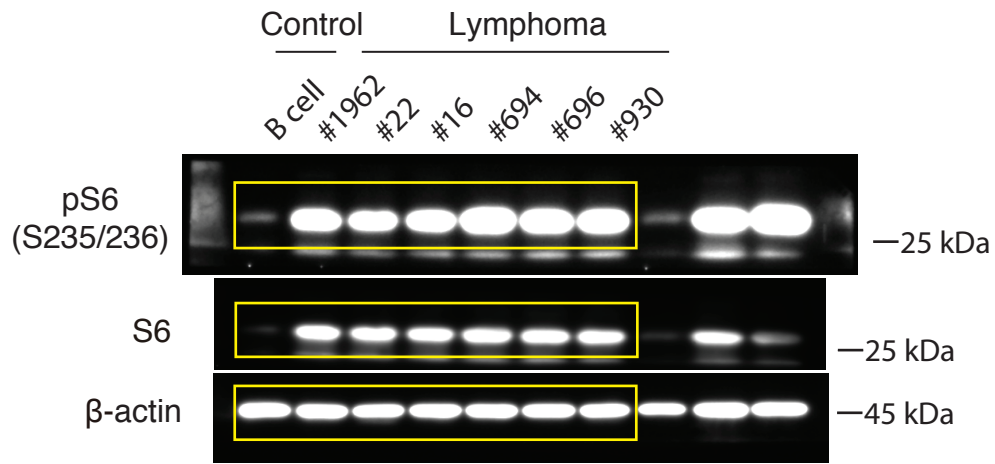

Supplement: emboj2013178df8d.pdf [file emboj2013178df8d.pdf]

### Source Data Fig S5B

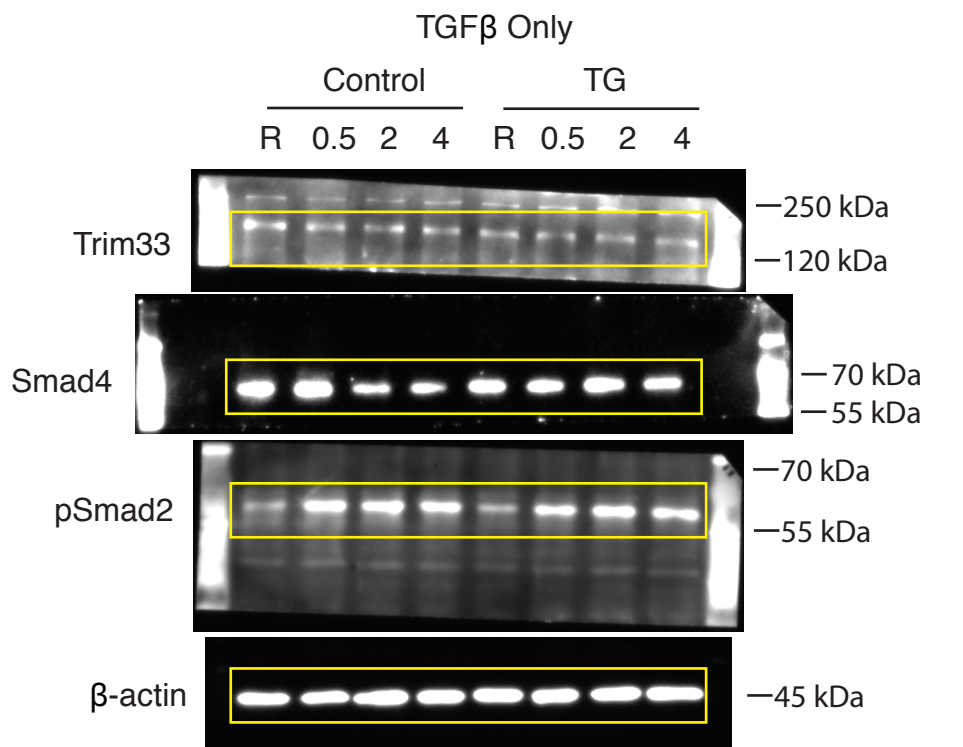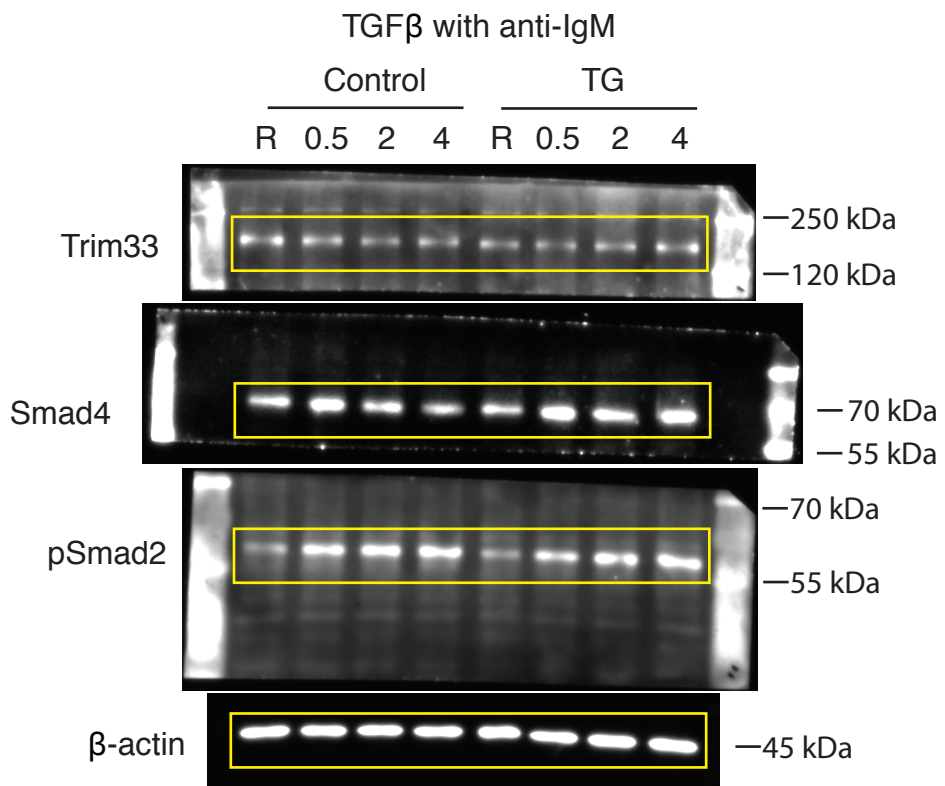

Supplement: emboj2013178dfs5b.pdf [file emboj2013178dfs5b.pdf]

Source Data Fig S7A

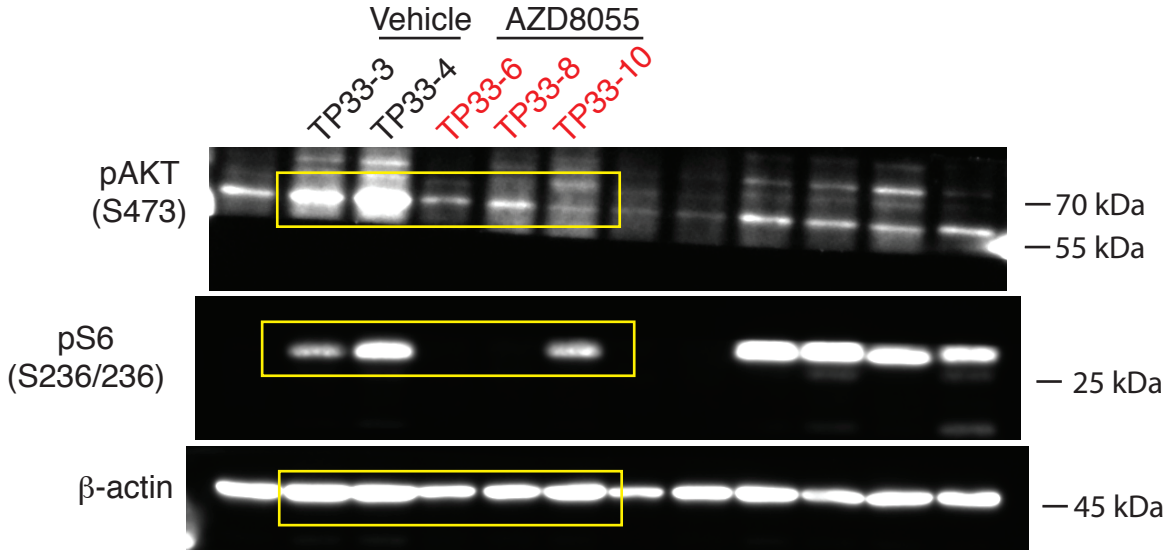

Source Data Fig S7C

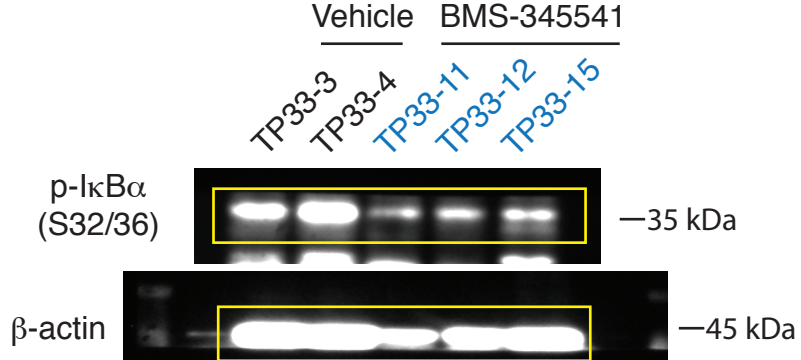

Supplement: emboj2013178dfs7.pdf [file emboj2013178dfs7.pdf]
